# Supplementary material
Source: MDPI journal article supplement (https://www.mdpi.com/2079-9276/7/2/38)
Supplement: s1 [file s1]

## Sheet: File legend
WORKBOOK LEGEND
Guidelines for revisions
Tabs are color coded according to their content.
General tabs for summary tables, NFA constant data, Protected Area info:
Summary tables	Tabs where there are overview tables with final EF results per each PA. There are mostly VLOOKUP and SUM equation linked to calculation tabs
Cnst NFA	All data taken from NFAs and used as parameters to convert input data into Footprint values
PA info	General info and characteristic of each package in all protected area. There are 13 packages in 13 Protected Area settle in 7 countries. Each package last max 6 days and have been made in fall 2018
Main tabs color coded according to the consumption category considered. There are 4 categories for which we asked info and data:
Accommodation	This category is about all the hosting facilities involved in the eco-tourism package, where the tourist will accommodate. Input data deal with general information on the type of hosting facility and its characteristics, energy consumption (including electricity, water consumption, heating and cooling system, hot water production), furniture, and the good and services provided. ATTENTION: in Korn…
Food&Drinks	This category is about all the main meals envisioned in the ecotourism package (breakfast, lunch, dinner, other). For each meal there is the same list of food and drink items (70 items in total). Depending on the type, origin and quality, Consider each single meal that will be offered by the package. For each item, input data are about the origin (local, national, internationa), the mode of produ…
Activity	This category is about all the services and activities provided in the eco-tourism package. For each service, data about the kind of activity carried out, energy or resources needed to perform the activity.
Mobility	This category is about the mobility and transfer services envisioned in the package. Data about each single transfer day by day for the entire package have been requested, concerning mode of transportation (e.g. walking, car, bike, bus etc), distance covered, type of fuel, efficiency of fuel.
Each category tabs is named according to their function (es. Accommodation_survey, cnst_accommodation, Accommodation_EF calculation, Accommodation_EF recap and the same for all other categories)
XX_survey	All input data got from the PA. No calculation performed, data have been only adjusted in format, checked and eventually corrected. Also, colums have been added for VLOOKUP ID for the calculation in the other tabs
cnst_XX	In these tabs there are all the constant values and parameters that are used to transform input data into Footprint results. Most of them are taken from NFA, other comes from literature or papers. These are data that are mostly recalled in calculation tabs with the VLOOKUP equation
XX_EF calculation	These are the main tabs where calculation are performed and where many VLOOKUP, IF, SUMIF, equations are included
XX_EF recap	These are the tabs where the final Footprint results by land type have been calculated for the specific category for all the Pas.
In all tabs you can find some different formats:
Text in red	Input Data that we have checked/adjusted and corrected
Yellow cell	input Data that have not been checked with the Protected Area and need to be verified
Grey cell	Original data directly taken from the sources. In calculation are mainly input data from surveys, whereas in constant tabs they are mainly from literature/sources/databases
White cell	Data that have been calculated with formulas. Cells where you find an equation within and not an original number
Comments	Comments in cells explain what we have considered/assumed

## Sheet: Summary
Round 1	EF of DestiMED packages by Land Type - Round 1								EF of DestiMED packages by category - Round 1
PA name	cropland	grazing	forest	fishing	built up	carbon	total		PA name	Accommodation	Food & Drinks	Mobility & transfer	Activities & Services	total
[-]	[gha package-1]	[gha package-1]	[gha package-1]	[gha package-1]	[gha package-1]	[gha package-1]	[gha package-1]		[-]	[gha package-1]	[gha package-1]	[gha package-1]	[gha package-1]	[gha package-1]
Round 2	EF of DestiMED packages by Land Type - Round 2								EF of DestiMED packages by category - Round 2
PA name	cropland	grazing	forest	fishing	built up	carbon	total		PA name	Accommodation	Food & Drinks	Mobility & transfer	Activities & Services	total
[-]	[gha package-1]	[gha package-1]	[gha package-1]	[gha package-1]	[gha package-1]	[gha package-1]	[gha package-1]		[-]	[gha package-1]	[gha package-1]	[gha package-1]	[gha package-1]	[gha package-1]
Round 1	1	EF of DestiMED packages per person by Land Type - Round 1							EF of DestiMED packages per person by category - Round 1
PA name	cropland	grazing	forest	fishing	built up	carbon	total		PA name	Accommodation	Food & Drinks	Mobility & transfer	Activities & Services	total
[-]	[gha cap-1 day-1]	[gha cap-1 day-1]	[gha cap-1 day-1]	[gha cap-1 day-1]	[gha cap-1 day-1]	[gha cap-1 day-1]	[gha cap-1 day-1]		[-]	[gha cap-1 day-1]	[gha cap-1 day-1]	[gha cap-1 day-1]	[gha cap-1 day-1]	[gha cap-1 day-1]
0	#N/A	#N/A	#N/A	#N/A	#N/A	#N/A	#N/A		0	#N/A	#N/A	#N/A	#N/A	#N/A
0	#N/A	#N/A	#N/A	#N/A	#N/A	#N/A	#N/A		0	#N/A	#N/A	#N/A	#N/A	#N/A
0	#N/A	#N/A	#N/A	#N/A	#N/A	#N/A	#N/A		0	#N/A	#N/A	#N/A	#N/A	#N/A
0	#N/A	#N/A	#N/A	#N/A	#N/A	#N/A	#N/A		0	#N/A	#N/A	#N/A	#N/A	#N/A
0	#N/A	#N/A	#N/A	#N/A	#N/A	#N/A	#N/A		0	#N/A	#N/A	#N/A	#N/A	#N/A
0	#N/A	#N/A	#N/A	#N/A	#N/A	#N/A	#N/A		0	#N/A	#N/A	#N/A	#N/A	#N/A
0	#N/A	#N/A	#N/A	#N/A	#N/A	#N/A	#N/A		0	#N/A	#N/A	#N/A	#N/A	#N/A
0	#N/A	#N/A	#N/A	#N/A	#N/A	#N/A	#N/A		0	#N/A	#N/A	#N/A	#N/A	#N/A
0	#N/A	#N/A	#N/A	#N/A	#N/A	#N/A	#N/A		0	#N/A	#N/A	#N/A	#N/A	#N/A
0	#N/A	#N/A	#N/A	#N/A	#N/A	#N/A	#N/A		0	#N/A	#N/A	#N/A	#N/A	#N/A
0	#N/A	#N/A	#N/A	#N/A	#N/A	#N/A	#N/A		0	#N/A	#N/A	#N/A	#N/A	#N/A
0	#N/A	#N/A	#N/A	#N/A	#N/A	#N/A	#N/A		0	#N/A	#N/A	#N/A	#N/A	#N/A
0	#N/A	#N/A	#N/A	#N/A	#N/A	#N/A	#N/A		0	#N/A	#N/A	#N/A	#N/A	#N/A
Note: this EF per day is an average dividing the total EF per package by the number of days. In this way all the packages are comparable
Round 2	2	EF of DestiMED packages per person by Land Type - Round 2							EF of DestiMED packages per person by category - Round 2
PA name	cropland	grazing	forest	fishing	built up	carbon	total		PA name	Accommodation	Food & Drinks	Mobility & transfer	Activities & Services	total
[-]	[gha cap-1 day-1]	[gha cap-1 day-1]	[gha cap-1 day-1]	[gha cap-1 day-1]	[gha cap-1 day-1]	[gha cap-1 day-1]	[gha cap-1 day-1]		[-]	[gha cap-1 day-1]	[gha cap-1 day-1]	[gha cap-1 day-1]	[gha cap-1 day-1]	[gha cap-1 day-1]
0	#N/A	#N/A	#N/A	#N/A	#N/A	#N/A	#N/A		0	#N/A	#N/A	#N/A	#N/A	#N/A
0	#N/A	#N/A	#N/A	#N/A	#N/A	#N/A	#N/A		0	#N/A	#N/A	#N/A	#N/A	#N/A
0	#N/A	#N/A	#N/A	#N/A	#N/A	#N/A	#N/A		0	#N/A	#N/A	#N/A	#N/A	#N/A
0	#N/A	#N/A	#N/A	#N/A	#N/A	#N/A	#N/A		0	#N/A	#N/A	#N/A	#N/A	#N/A
0	#N/A	#N/A	#N/A	#N/A	#N/A	#N/A	#N/A		0	#N/A	#N/A	#N/A	#N/A	#N/A
0	#N/A	#N/A	#N/A	#N/A	#N/A	#N/A	#N/A		0	#N/A	#N/A	#N/A	#N/A	#N/A
0	#N/A	#N/A	#N/A	#N/A	#N/A	#N/A	#N/A		0	#N/A	#N/A	#N/A	#N/A	#N/A
0	#N/A	#N/A	#N/A	#N/A	#N/A	#N/A	#N/A		0	#N/A	#N/A	#N/A	#N/A	#N/A
0	#N/A	#N/A	#N/A	#N/A	#N/A	#N/A	#N/A		0	#N/A	#N/A	#N/A	#N/A	#N/A
0	#N/A	#N/A	#N/A	#N/A	#N/A	#N/A	#N/A		0	#N/A	#N/A	#N/A	#N/A	#N/A
0	#N/A	#N/A	#N/A	#N/A	#N/A	#N/A	#N/A		0	#N/A	#N/A	#N/A	#N/A	#N/A
0	#N/A	#N/A	#N/A	#N/A	#N/A	#N/A	#N/A		0	#N/A	#N/A	#N/A	#N/A	#N/A
0	#N/A	#N/A	#N/A	#N/A	#N/A	#N/A	#N/A		0	#N/A	#N/A	#N/A	#N/A	#N/A
Note: this EF per day is an average dividing the total EF per package by the number of days. In this way all the packages are comparable

## Sheet: Summary by PA
PA name										PA name							Check
Category	cropland	grazing	forest	fishing	built up	carbon	total			Category	cropland	grazing	forest	fishing	built up	carbon	Total
	[gha package-1]	[gha package-1]	[gha package-1]	[gha package-1]	[gha package-1]	[gha package-1]	[gha package-1]				[gha package-1]	[gha package-1]	[gha package-1]	[gha package-1]	[gha package-1]	[gha package-1]	%
Accomm.										Accomm.
Food & Drinks										Food & Drinks
Mobility & transfer										Mobility & transfer
Activities & Services										Activities & Services
total										total
PA name	cropland	grazing	forest	fishing	built up	carbon				PA name	cropland	grazing	forest	fishing	built up	carbon
	%	%	%	%	%	%					%	%	%	%	%	%
Accomm.										Accomm.
Food & Drinks										Food & Drinks
Mobility & transfer										Mobility & transfer
Activities & Services										Activities & Services

## Sheet: Summary by day
Survey Round
PA name - Survey Round 1	PA name	Accomm.	Food & Drinks	Mobility & transfer	Activities & Services	total
	[-]	[gha day-1]	[gha day-1]	[gha day-1]	[gha day-1]	[gha day-1]
1	Day 1
1	Day 2
1	Day 3
1	Day 4
1	Day 5
1	Day 6
1	Day 7
1	Total
1
PA name - Survey Round 1	PA name	Accomm.	Food & Drinks	Mobility & transfer	Activities & Services	total
	[-]	[gha day-1]	[gha day-1]	[gha day-1]	[gha day-1]	[gha day-1]
1	Day 1
1	Day 2
1	Day 3
1	Day 4
1	Day 5
1	Day 6
1	Day 7
1	Total
1
PA name - Survey Round 1	PA name	Accomm.	Food & Drinks	Mobility & transfer	Activities & Services	total
	[-]	[gha day-1]	[gha day-1]	[gha day-1]	[gha day-1]	[gha day-1]
1	Day 1
1	Day 2
1	Day 3
1	Day 4
1	Day 5
1	Day 6
1	Day 7
1	Total
1

## Sheet: Accommodation analysis
Accommodation - Round 1
PA name	cropland	grazing	forest	fishing	built up	carbon	total		cropland	grazing	forest	fishing	built up	carbon
[-]	[gha]	[gha]	[gha]	[gha]	[gha]	[gha]	[gha]		%	%	%	%	%	%
0	#N/A	#N/A	#N/A	#N/A	#N/A	#N/A	#N/A
Accommodation - Round 2
PA name	cropland	grazing	forest	fishing	built up	carbon	total		cropland	grazing	forest	fishing	built up	carbon
[-]	[gha]	[gha]	[gha]	[gha]	[gha]	[gha]	[gha]		%	%	%	%	%	%

## Sheet: Accommodation EF recap
	Accommodation										Accommodation - Round 1										Accommodation - Round 2
Round Survey	PA name	Day of accommodation	cropland	grazing	forest	fishing	built up	carbon	total		PA name	cropland	grazing	forest	fishing	built up	carbon	total			PA name	cropland	grazing	forest	fishing	built up	carbon	total
	[-]	[#]	[gha]	[gha]	[gha]	[gha]	[gha]	[gha]	[gha]		[-]	[gha]	[gha]	[gha]	[gha]	[gha]	[gha]	[gha]			[-]	[gha]	[gha]	[gha]	[gha]	[gha]	[gha]	[gha]
1
1
1
1
1
1
1
1
1
1
1
1
1
1
1
1
1
1
1
1
1
1
1
1
1
1
1
1
1
1
1
1
1
1
1
1
1
1
1
1
1
1
1
1
1
1
1
1
1
1
1
1
1
1
1
1
1
1
1
1
1
1
1
1
1
1
1
1
1
1
1
1
1
1
1
1
1
1
1
1
1
1
1
1
1
1
1
1
1
1
1
2
2
2
2
2
2
2
2
2
2
2
2
2
2
2
2
2
2
2
2
2
2
2
2
2
2
2
2
2
2
2
2
2
2
2
2
2
2
2
2
2
2
2
2
2
2
2
2
2
2
2
2
2
2
2
2
2
2
2
2
2
2
2
2
2
2
2
2
2
2
2
2
2
2
2
2
2
2
2
2
2
2
2
2
2
2
2
2
2
2
2

## Sheet: Accomm EF calculation
Round Survey	Country name	PA name	Accommodation	Day of accommodation	Annual or seasonal opening	Opening	Opening	Opening	Opening	Opening	Number of workers	Number of tourists (summer)	Number of tourists (autumn)	Number of tourists (winter)	Number of tourists (spring)	Number of tourists in an average year	Total number of tourists	Number of tourists per day	cropland	grazing	forest	fishing	built up	carbon	total		Accommodation type	Number of floors	Building Area	Common Areas	Room size	Forest Footprint	Built-up Footprint	Carbon Footprint		Electricity (grid connection)	Annual electricity consumption	Type of alternative energy source	alternative energy source consumption	Carbon Footprint		Separated heating system	heating system energy source	alternative energy source consumption	Carbon Footprint		Combined hot water	Separated hot water	alternative energy source consumption
	[-]	[-]	[-]	[#]	[-]	[from]	[to]	[from]	[to]	[# months]	[Persons]	[#]	[#]	[#]	[#]	[#]	[#]	[# day-1]	[gha]	[gha]	[gha]	[gha]	[gha]	[gha]	[gha]		[-]	[#]	[m2]	[m2]	[m2]	[gha]	[gha]	[gha]		[plant type]	[kWh yr-1]	[-]	[(kWh or m3 or L) yr-1]	[gha]		[-]	[source type]	[kWh or m3 or L]	[gha]		[yes/no]	[source type]	[kWh or m3 or L]
1
1
1
1
1
1
1
1
1
1
1
1
1
1
1
1
1
1
1
1
1
1
1
1
1
1
1
1
1
1
1
1
1
1
1
1
1
1
1
1
1
1
1
1
1
1
1
1
1
1
1
1
1
1
1
1
1
1
1
1
1
1
1
1
1
1
1
1
1
1
1
1
1
1
1
1
1
1
1
1
1
1
1
1
1
1
1
1
1
1
1
2
2
2
2
2
2
2
2
2
2
2
2
2
2
2
2
2
2
2
2
2
2
2
2
2
2
2
2
2
2
2
2
2
2
2
2
2
2
2
2
2
2
2
2
2
2
2
2
2
2
2
2
2
2
2
2
2
2
2
2
2
2
2
2
2
2
2
2
2
2
2
2
2
2
2
2
2
2
2
2
2
2
2
2
2
2
2
2
2
2
2
[truncated: 1 more columns]

## Sheet: cnst_accomm
Footprint intensity factors for building. Source: Bastianoni et al., 2007. Ambio 36 (7), 559-565.
	Forest Footprint	Built-up Footprint
Building type	[gha/m2]	[gha/m2]
2-storey detached house	0.00019375	0.000216875
4-storey condominium	0.000386875	0.000216875
Energy content	MJ/unit
kiloWattHour (kWh)	3.6
crude oil (L)	38.5
Gasoline (L)	32.1
Diesel (L)	35.8
Natural Gas (m3)	38.2
LPG (L)	23.3
Wood (kg)	19
Footprint intensity factors for energy system from alternative sources
CO2 emissions factor for ELECTRICITY GENERATION by type of fuel/energy source
Type of alternative energy source	Carbon emission factor	Source
[-]	[kg CO2 (kWh)-1 or l-1 or m3-1]	[-]
Photovoltaic	0.035	UK POST (Parliamentary Office for Science and Technology)
Wind energy	0.00464	UK POST (Parliamentary Office for Science and Technology)
Thermoelectric generator	0.939676	US EIA (Energy Information Administration)
Geothermal energy	0.026307	US EIA (Energy Information Administration)
Hydro generator	0.003	UK POST (Parliamentary Office for Science and Technology)
LPG	4.20694	UK POST (Parliamentary Office for Science and Technology)
Natural Gas	4.47841	US EIA (Energy Information Administration)
Diesel	9.34456	assumed equal to petroleum
Solar	0.035	assumed equal to PV
HEATING SYSTEM
heating system energy source	Carbon Emission factor	Source
[source type]	[kg CO2 (kWh)-1 or l-1 or m3-1 or kg]	[-]
Electricity	0.37	UK POST, 2016 (Parliamentary Office for Science and Technology). Carbon Footprint of heat generation
Natural Gas (methane)	1.92122	EPA, 2016. Direct emissions from stationary combustions
LPG (propane)	1.36288	EPA, 2016. Direct emissions from stationary combustions
Heating oil	3.08278	UK POST, 2016 (Parliamentary Office for Science and Technology). Carbon Footprint of heat generation
Heat pump	0.07	UK POST, 2016 (Parliamentary Office for Science and Technology). Carbon Footprint of heat generation
Solar energy	0.01	UK POST, 2016 (Parliamentary Office for Science and Technology). Carbon Footprint of heat generation
Biomass (Wood and Pellet) m3	1.68929	EPA, 2016. Direct emissions from stationary combustions
HOT WATER PRODUCTION
Hot water enrgy source	Carbon Emission factor	Source
[source type]	[kg CO2 (kWh)-1 or l-1 or m3-1]	[-]
Electricity	0.45	Hong and Howhart, 2016. GHG emissions from domestic hot water.
Natural Gas (methane)	3.3043	Hong and Howhart, 2016. GHG emissions from domestic hot water.
LPG (propane)	3.3043	Assumed equal to natural gas
Heating oil	3.08596	Hong and Howhart, 2016. GHG emissions from domestic hot water.
Heat pump	0.1512	Hong and Howhart, 2016. GHG emissions from domestic hot water.
Solar energy	0	Until we find a proper value, we estimate no emissions due to hot water production by solar panels
Biomass (Wood and Pellet)	0.786389	https://www.all-energy.co.uk/RXUK/RXUK_All-Energy/2016/Presentations%202016%20Day%202/SuperGEN%20Bioenergy%20Hub/Mirjam%20Roeder.pdf?v=635996123206158437

## Sheet: Accommodation_Survey
Input data from Accommodation section of the survey

## Sheet: Food&Drink analysis
Round	1
PA name	cropland	grazing	forest	fishing	built up	carbon	total		Crop	Grazi	Forest	Fishing	Built-up	carbon
[-]	[gha pack-1]	[gha pack-1]	[gha pack-1]	[gha pack-1]	[gha pack-1]	[gha pack-1]	[gha pack-1]		%	%	%	%	%	%
Round	2
PA name	cropland	grazing	forest	fishing	built up	carbon	total		Crop	Grazi	Forest	Fishing	Built-up	carbon
[-]	[gha pack-1]	[gha pack-1]	[gha pack-1]	[gha pack-1]	[gha pack-1]	[gha pack-1]	[gha pack-1]		%	%	%	%	%	%

[truncated: 19 more sheets: Food&Drink EF recap, Food EF calculation, cnst_food&drinks, Food_Survey, Activity Analysis, Activity EF recap, Activity EF calculation, cnst_activity, Activity_Survey, Mobility analysis, Mobility EF recap, Mobility EF calculation, cnst_mobility, Mobility_Survey, cnst_NFA, cnst_labor, Raw data NFA 2017 Ed, PAs list, Info_survey]
